# Supplementary material
Source: MDPI journal article supplement (https://www.mdpi.com/2071-1050/15/16/12547)
Supplement: s1 [file s1]

**Table S1.** Chemical reaction and nutrient content (%) of chemical fertilizers applied into the soils.

| Fertilizer Source              | pH      | %N | %P <sub>2</sub> O <sub>5</sub> | %K <sub>2</sub> O |
|--------------------------------|---------|----|--------------------------------|-------------------|
| Nitrophos (NP)                 | 3.5     | 22 | 20                             | -                 |
| Nitrophos Plus (NP Plus)       | 7.3     | 18 | 18                             | -                 |
| Di-Ammonium Phosphate (DAP)    | 7.5-8.0 | 18 | 46                             | -                 |
| Calcium Ammonium Nitrate (CAN) | 7.0     | 26 | -                              | -                 |
| Urea                           | 7.5     | 46 | -                              | -                 |
| Sulphate of Potash (SOP)       | 4.5     | -  | -                              | 50                |

**Table S2.** Highest maize grain yield obtained during [1] and 2020–2021 by the use of NP and CAN fertilizers.

| Sr. # | Farmer                            | Address and GPS coordinates                                                      | Crop         | Yield<br>(kg acre <sup>-1</sup> ) | Reference          |
|-------|-----------------------------------|----------------------------------------------------------------------------------|--------------|-----------------------------------|--------------------|
| 1     | Faisal Ali                        | 45/12L Chichawatni, Sahiwal, Punjab<br>30° 30' 36" N, 72° 42' 35.9994" E         | Autumn Maize | 3640                              | Unpublished (2018) |
| 2     | Maize & Millet Research Institute | Chak# 65/5L MMRI Yousafwala, Sahiwal, Punjab<br>30° 40' 47.9994" N, 73° 12' 0" E | Autumn Maize | 3600                              | Unpublished (2018) |
| 3     | Anwar Ali                         | 45/12L Chichawatni, Sahiwal, Punjab<br>30° 28' 48" N, 72° 40' 48" E              | Autumn Maize | 2640                              | Unpublished (2020) |
| 4     | Muhammad Ashfaq                   | Chak No.141/9L Sahiwal<br>30° 31' 11.9994" N, 72° 57' 35.9994" E                 | Autumn Maize | 2600                              | Unpublished (2020) |

|   |                  |                                                                              |                 |      |                    |
|---|------------------|------------------------------------------------------------------------------|-----------------|------|--------------------|
| 5 | Rehan Latif      | 45/12L Chichawatni, Sahiwal, Punjab<br>30° 28' 48" N, 72° 40' 48" E          | Autumn<br>Maize | 2600 | Unpublished (2020) |
| 6 | Abdul Shakoor    | ChakSadhay Khan NurPurPakpattan,<br>Sahiwal 30° 29'23.9994" N, 73° 18'36" E  | Autumn<br>Maize | 2560 | Unpublished (2020) |
| 7 | Mian Abdul Malik | AddaChanwat Tehsil &dist.Pakpattan<br>30° 23' 35.9994" N, 73° 19' 47.9994" E | Autumn<br>Maize | 2360 | Unpublished (2020) |

---

**Source:** 1) Technical Services Department, Marketing Division, Fatima Fertilizer Company (Pvt.) Ltd.

2) Agriculture Department, Govt. of the Punjab, Pakistan.

#### Reference

1. *Maize Yield Competition*; Government of the Punjab Commissioner's Office Sahiwal: Punjab, Pakistan, 2018.
